# Supplementary material for: Label-free liquid chromatography–mass spectrometry comparison of the breast muscle proteome profiles in two fast-growing broilers
Source: PubMed Central journal article supplement — Sci Rep. 2024 Jul 23;14:16886. doi: 10.1038/s41598-024-67993-9 (PMC11266551; doi:10.1038/s41598-024-67993-9), 2024-07-23
Supplement: 41598_2024_67993_MOESM1_ESM.pdf [file 41598_2024_67993_MOESM1_ESM.pdf]

# Phosphoglucomutase 1 (PGM1)

## Technical Replicate 1

kDa MW ~61

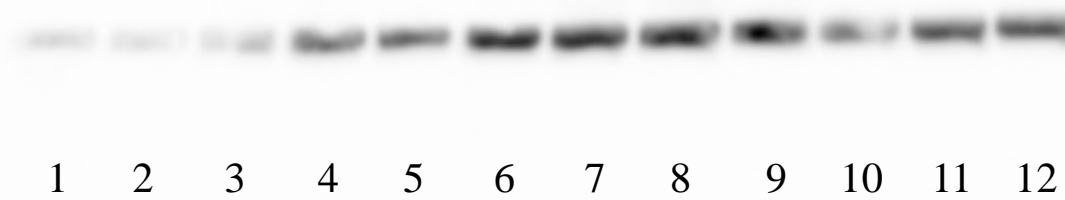

**1 to 6: Ross 508 (White chicken)**

**7 to 12: AZ Extra Heavy Red chicken (Red chicken)**

# Phosphoglucomutase 1 (PGM1)

## Technical Replicate 2

kDa MW ~61

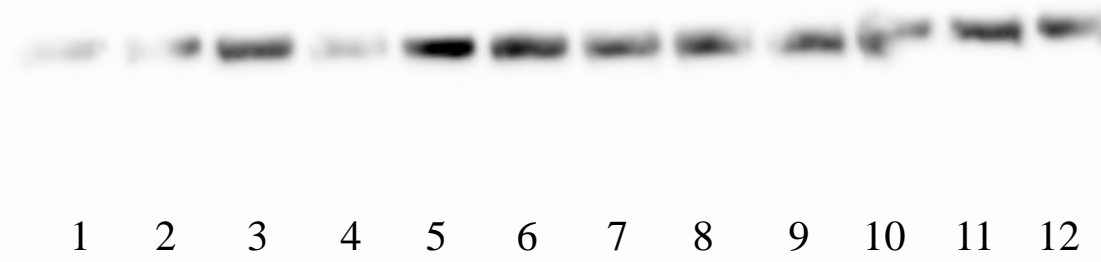

**1 to 6: Ross 508 (White chicken)**

**7 to 12: AZ Extra Heavy Red chicken (Red chicken)**

# Phosphoglucomutase 1 (PGM1)

## Technical Replicate 3

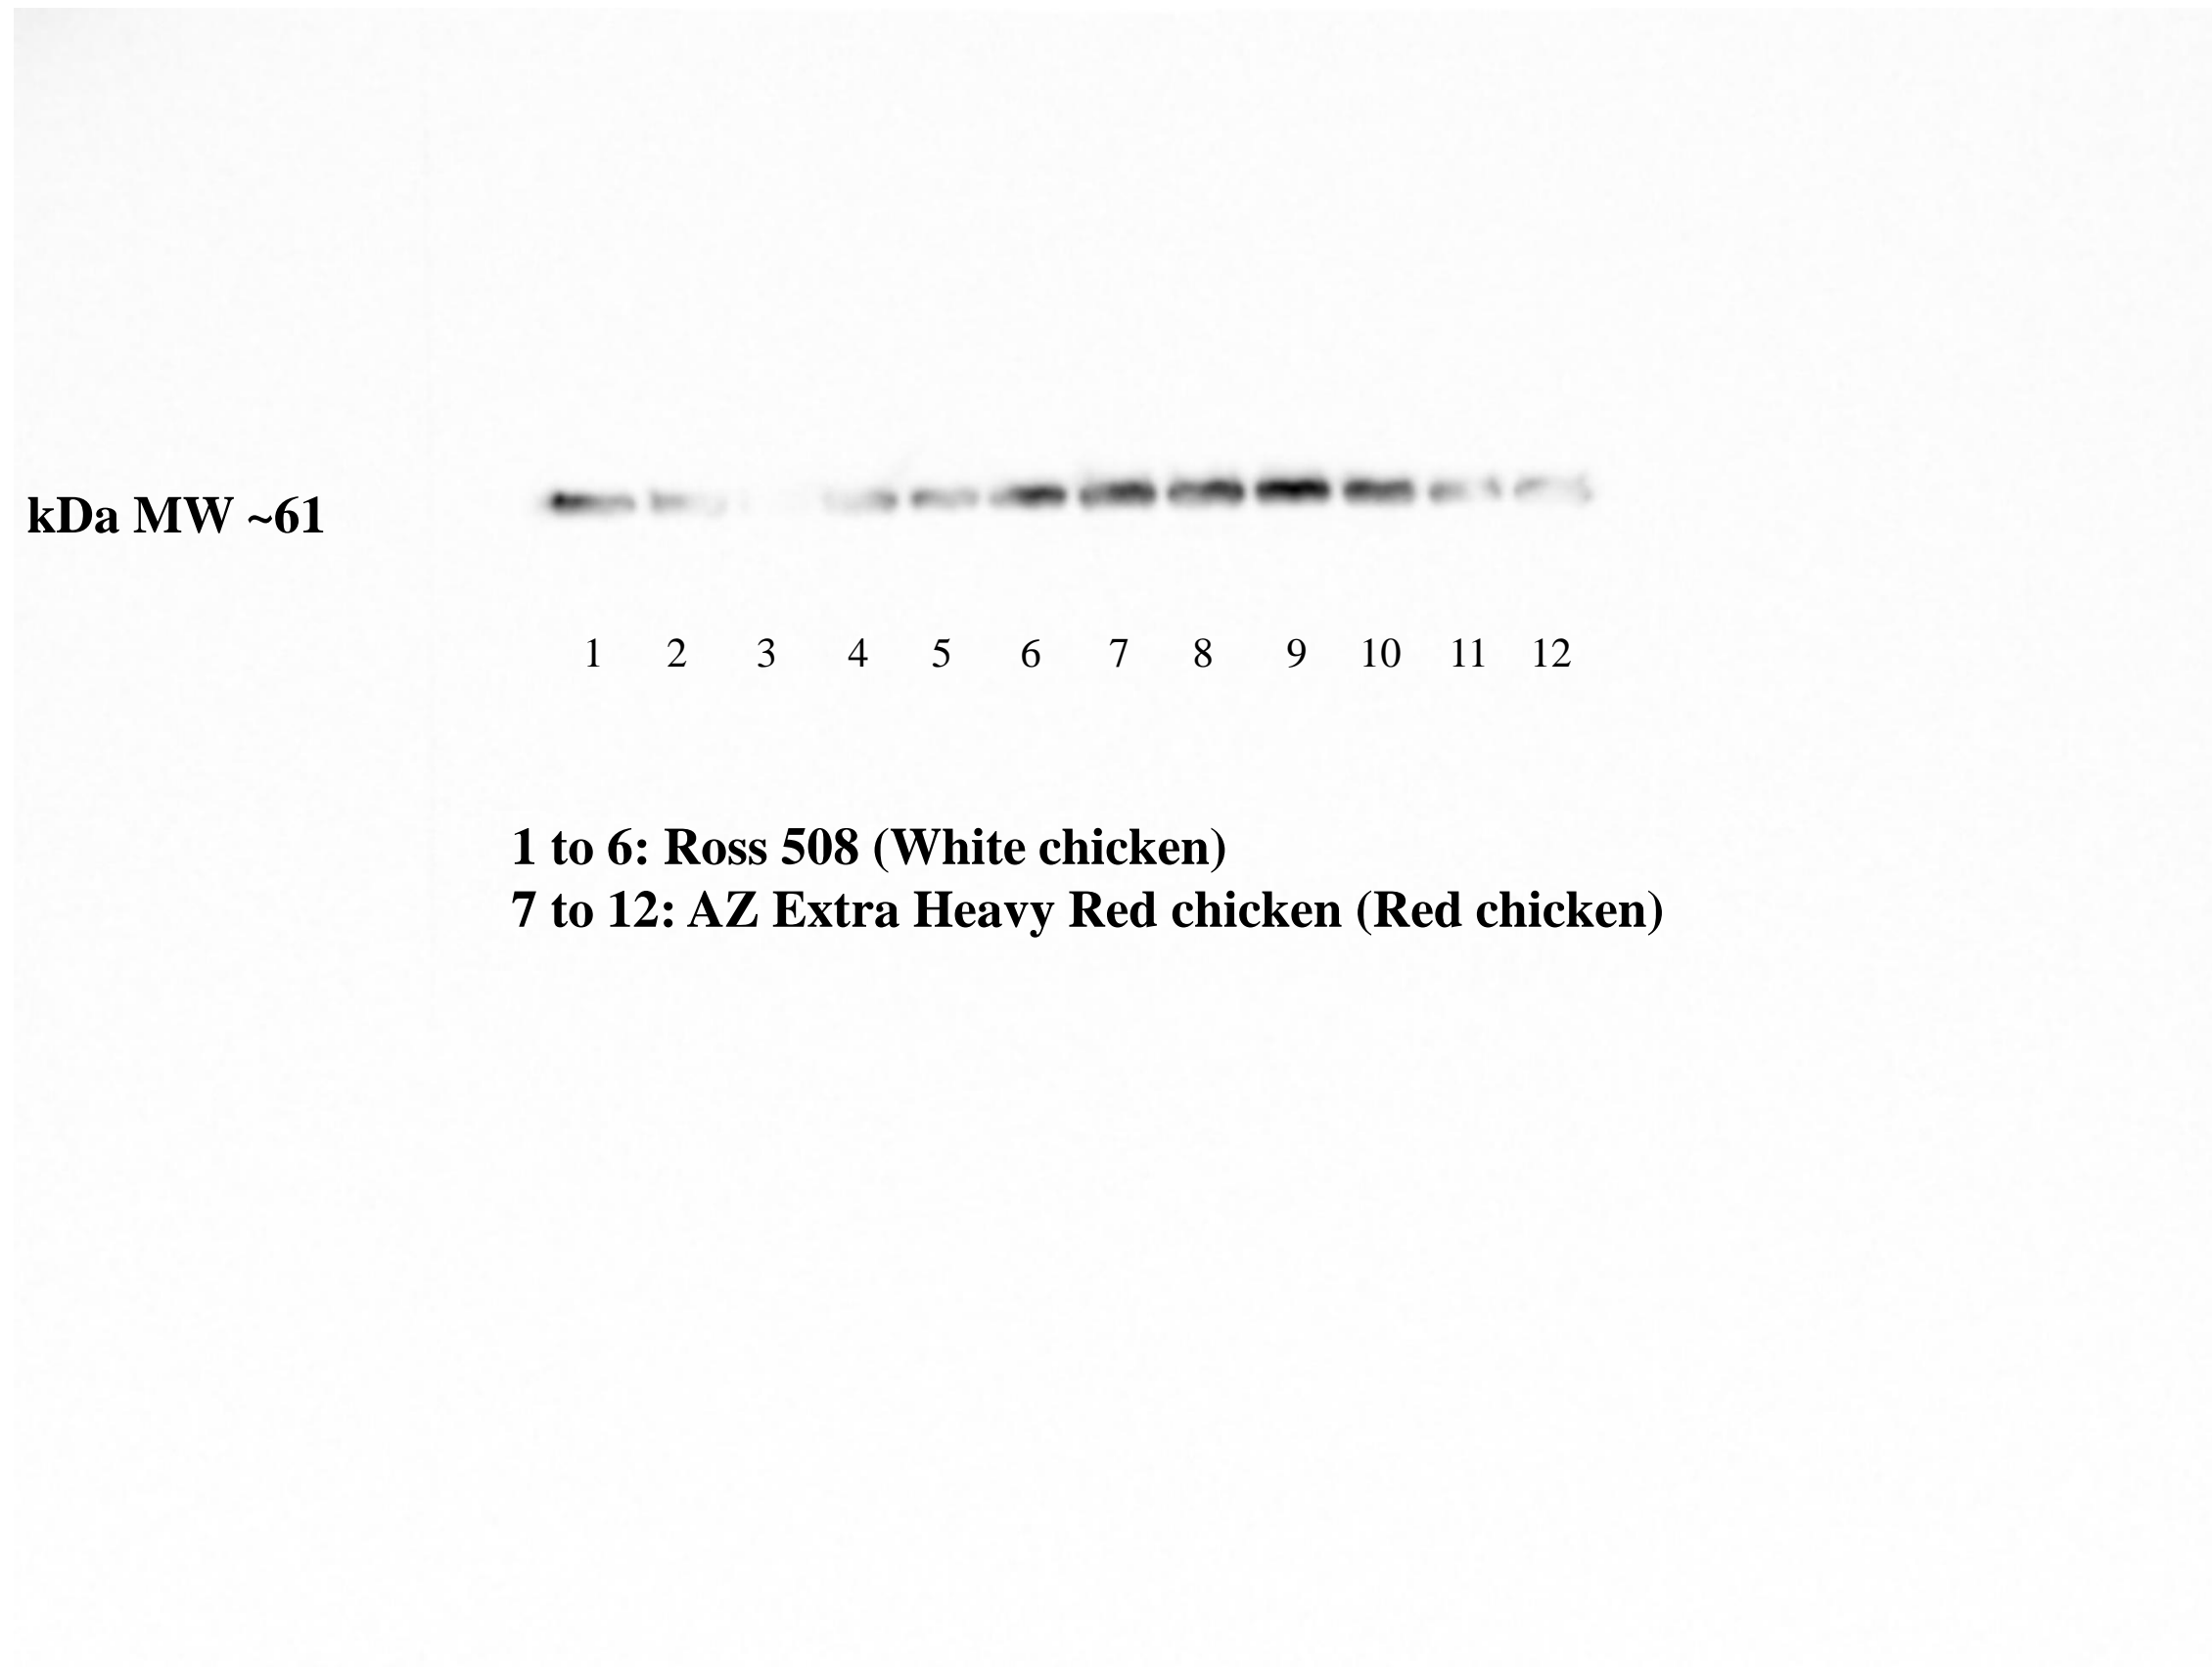

# Troponin T (TNNT)

## Technical Replicate 1

kDa MW ~39

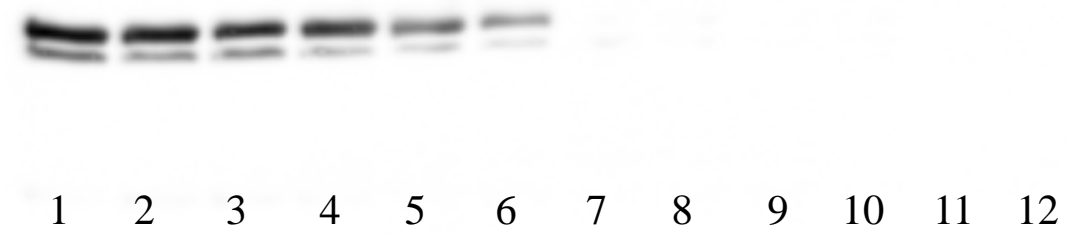

**1 to 6: Ross 508 (White chicken)**

**7 to 12: AZ Extra Heavy Red chicken (Red chicken)**

# Troponin T (TNNT)

## Technical Replicate 2

kDa MW ~39

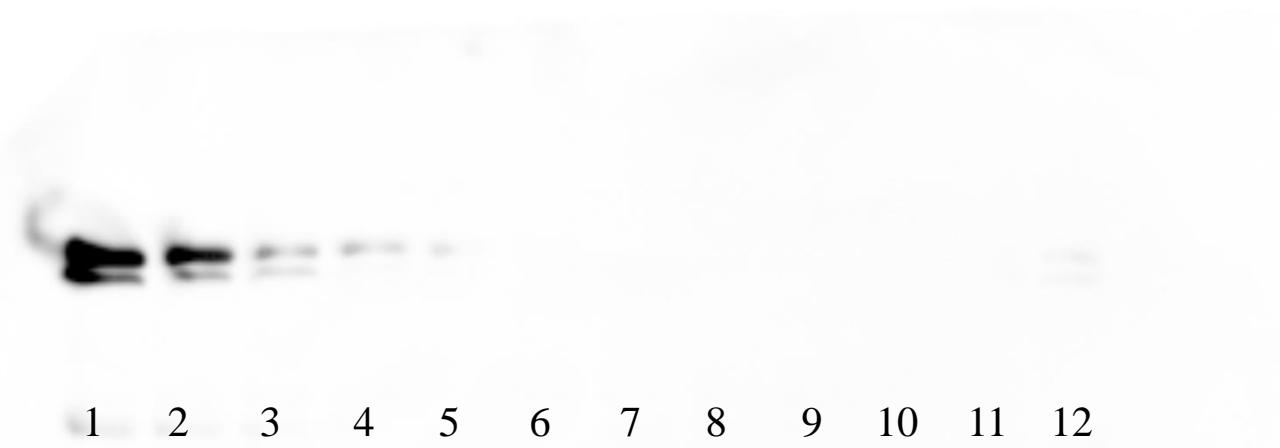

**1 to 6: Ross 508 (White chicken)**

**7 to 12: AZ Extra Heavy Red chicken (Red chicken)**

# Troponin T (TNNT)

## Technical Replicate 3

kDa MW ~39

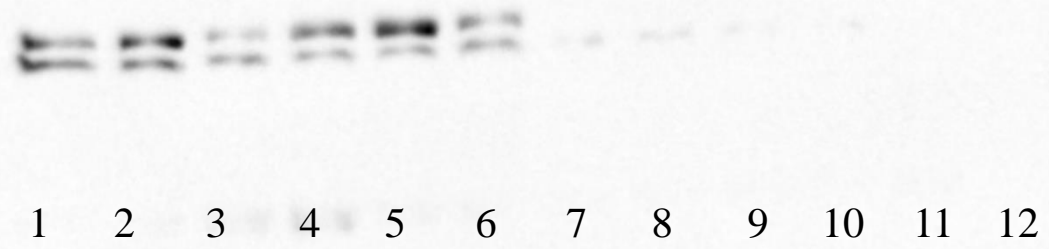

**1 to 6: Ross 508 (White chicken)**

**7 to 12: AZ Extra Heavy Red chicken (Red chicken)**
